# Supplementary material for: CLDN5 identified as a biomarker for metastasis and immune infiltration in gastric cancer via pan-cancer analysis
Source: publisher site journal article supplement (doi:10.18632/aging.204776), 2023-06-07
Supplement: Supplementary file [file aging-v15i11-204776-supplementary-material-SD1.pdf]

**SUPPLEMENTARY FIGURES**

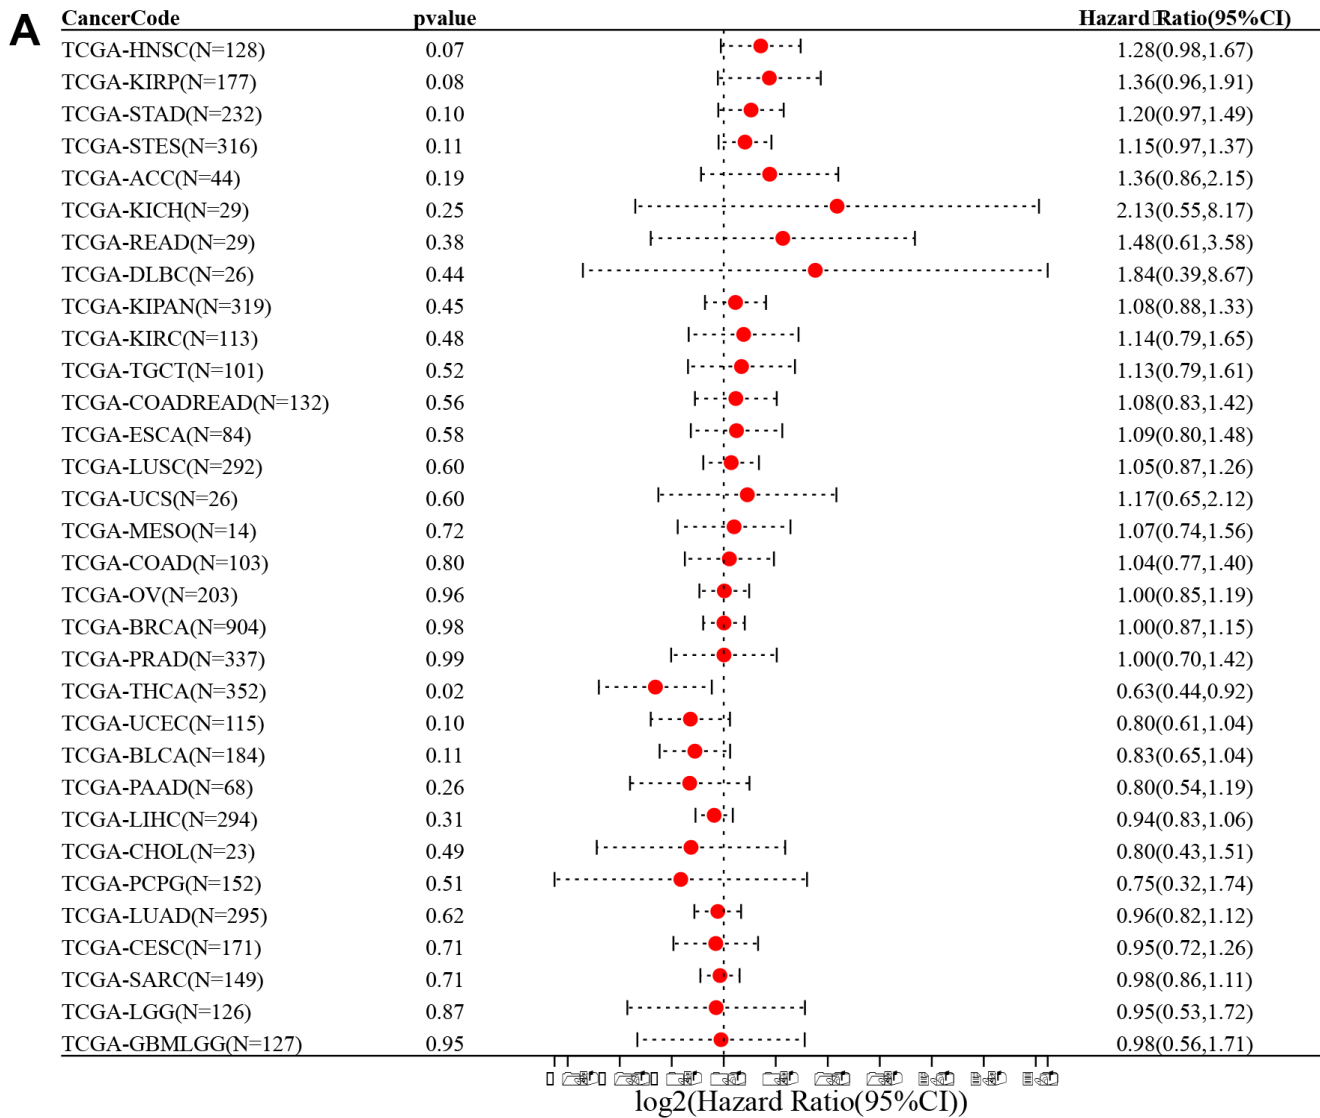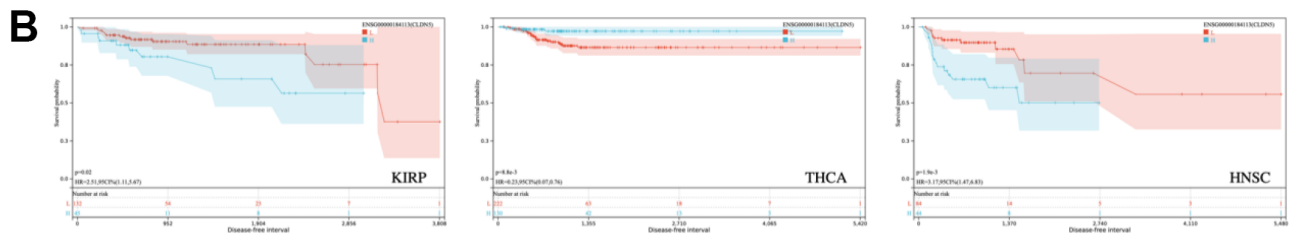

**Supplementary Figure 1. Association between CLDN5 expression and PFI of cancer patients. (A)** A forest plot of hazard ratios of CLDN5 in 36 types of tumors. **(B)** Kaplan-Meier survival curves of PFI for patients stratified by the different expressions of CLDN5 in KIRP, THCA, and HNSC.

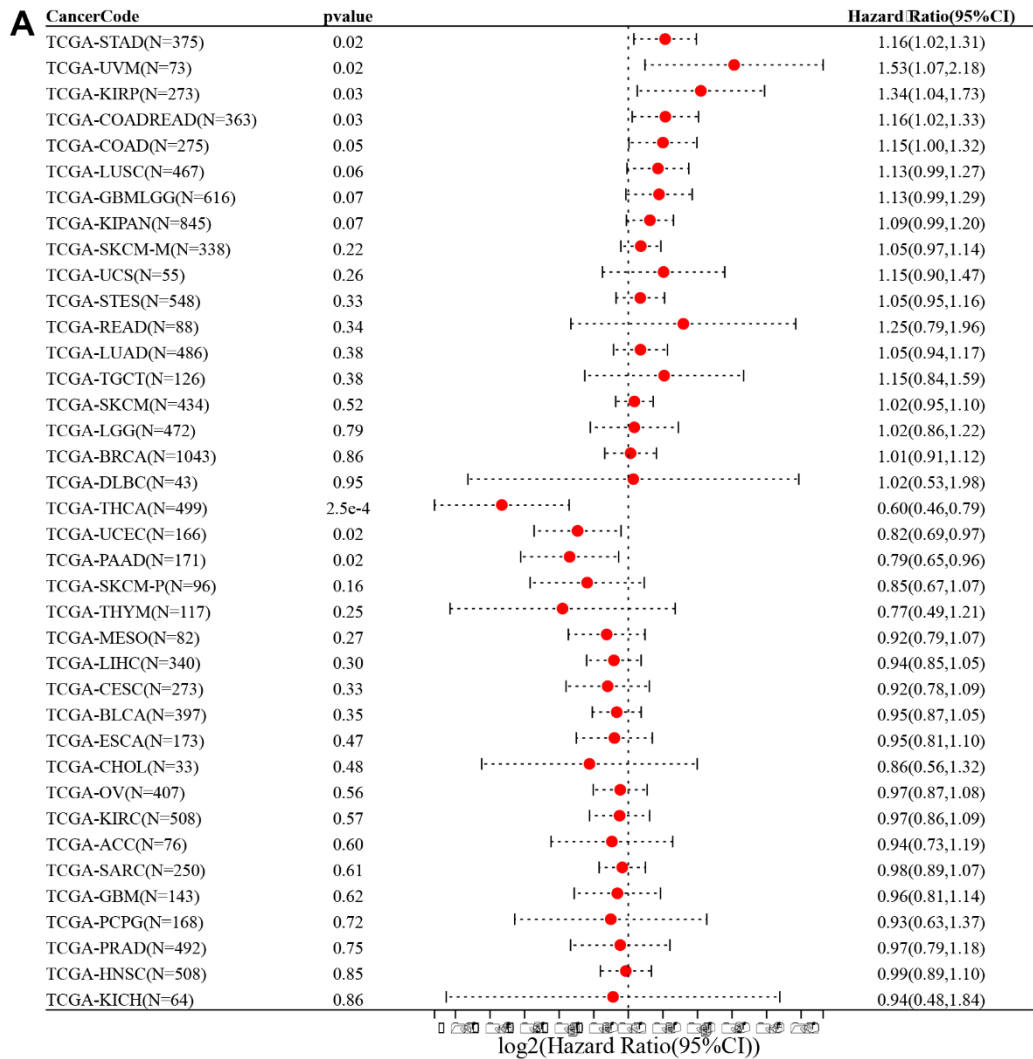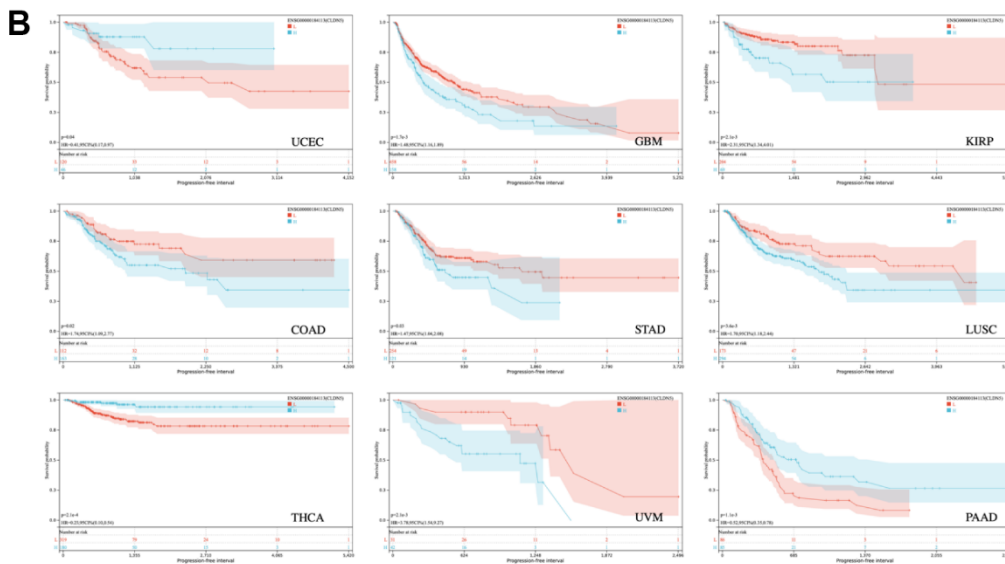

**Supplementary Figure 2. Association between CLDN5 expression and DFI in cancer patients. (A)** A forest plot of hazard ratios of CLDN5 in 36 types of tumors. **(B)** Kaplan-Meier survival curves of DFI for patients stratified by the different expressions of CLDN5 in UCEC, GBM, KIRP, COAD, STAD, LUSC, THCA, UVM, and PAAD.

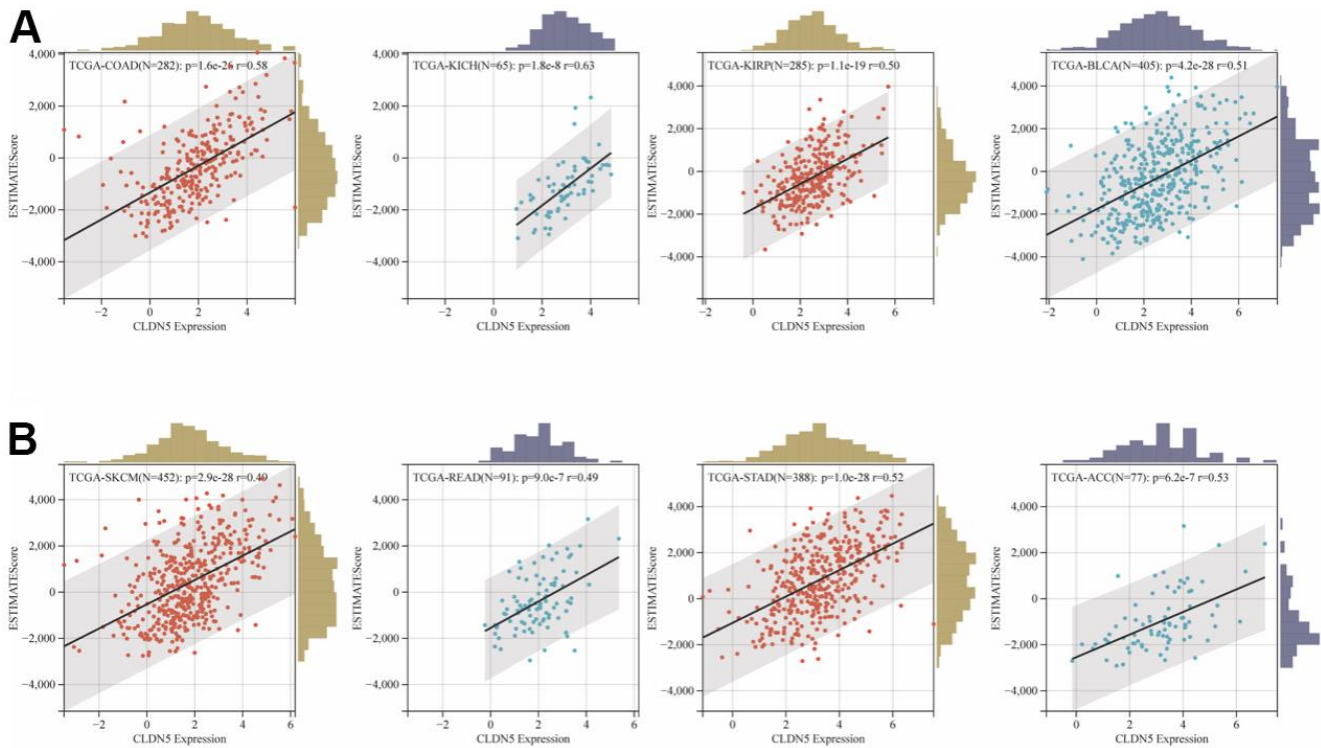

**Supplementary Figure 3. Correlation of CLDN5 with ESTIMATESCORE scores.** (A) The ESTIMATESCORE score in COAD, KICH, KIRP, and BLCA. (B) The ESTIMATESCORE score in SKCM, READ, STAD, and ACC.

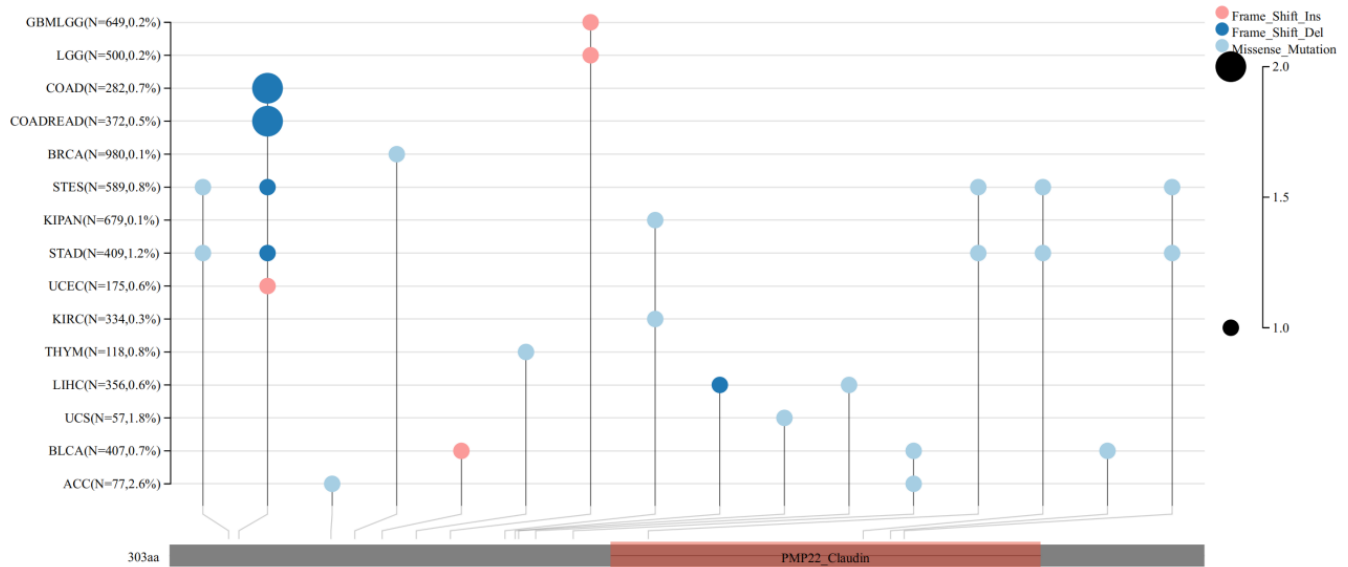

**Supplementary Figure 4. The mutational landscape of CLDN5 from TCGA.** The frameshift deletion of CLDN5 was markedly in COAD. In STAD, missense mutations of CLDN5 in various sites were obvious.
